# Supplementary material for: Regulation of the Late Onset alzheimer’s Disease Associated HLA-DQA1/DRB1 Expression
Source: PubMed Central journal article supplement — Am J Alzheimers Dis Other Demen. 2022 Mar 26;37:15333175221085066. doi: 10.1177/15333175221085066 (PMC10581112; doi:10.1177/15333175221085066), 2022-03-26
Supplement: sj-pdf-1-aja-10.1177_15333175221085066.pdf [file sj-pdf-1-aja-10.1177_15333175221085066.pdf]

- 1 **Supplementary Figure 1. EMSA showing allele-imbalanced gel shifting with the 6**
- 2 **candidate fSNPs on the *HLA-DRB1/DQA1* locus using NE from human frontal cortex.**
- 3 **Arrow indicating the allele-imbalanced gel shifting. Risk alleles are underlined.**

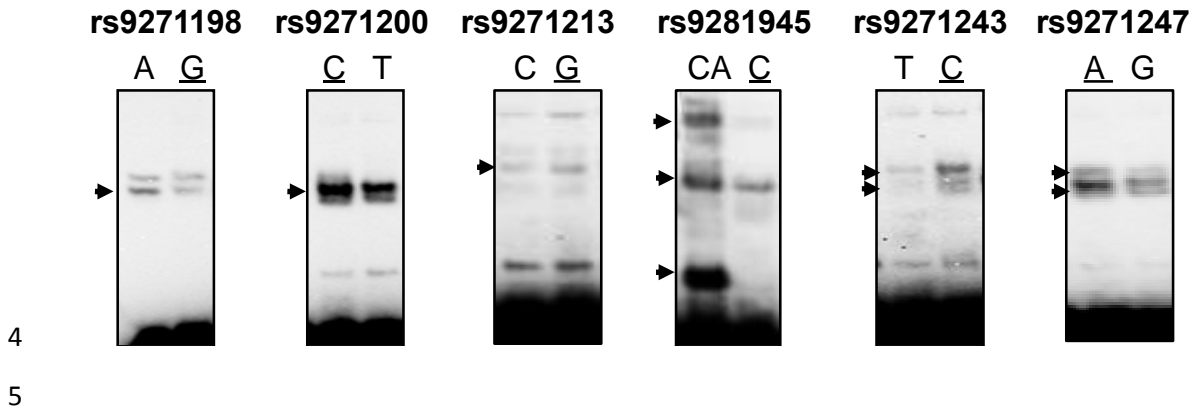

6 **Supplementary Figure 2. EMSA showing allele-imbalanced gel shifting with the 11**  
7 **putative fSNPs (A) and 10 SNPs randomly selected from the 42 non-fSNPs (B).** At least 8  
8 putative fSNPs and 4 non-fSNPs showed allele-imbalanced gel shifting (indicated by arrows),  
9 demonstrating that they are functional. The data together with the data from **Fig. 1** also suggest  
10 a ~83% positive recovery rate and a 40% false negative rate for this Reel-seq screen. Arrow  
11 indicating the allele-imbalanced gel shifting.

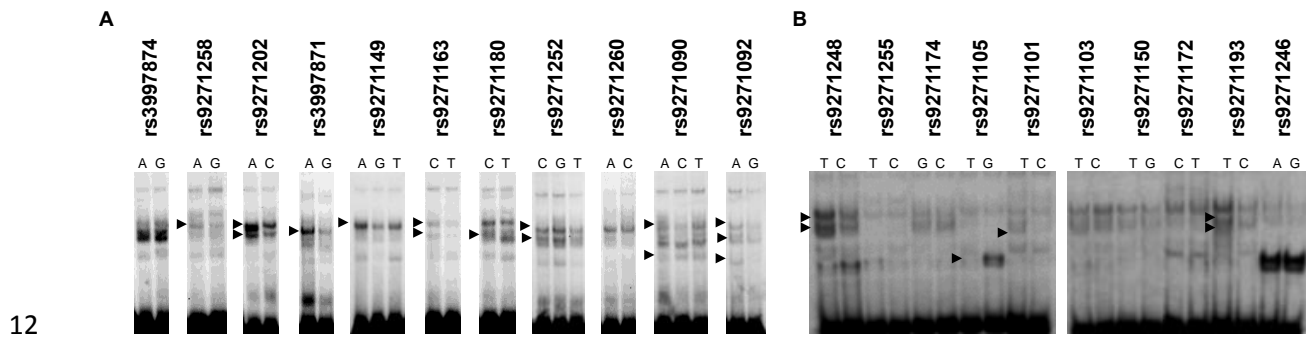

14 **Supplementary Figure 3. Ingenuity pathway analysis on the 42 proteins identified by**  
15 **SDCP-MS.**

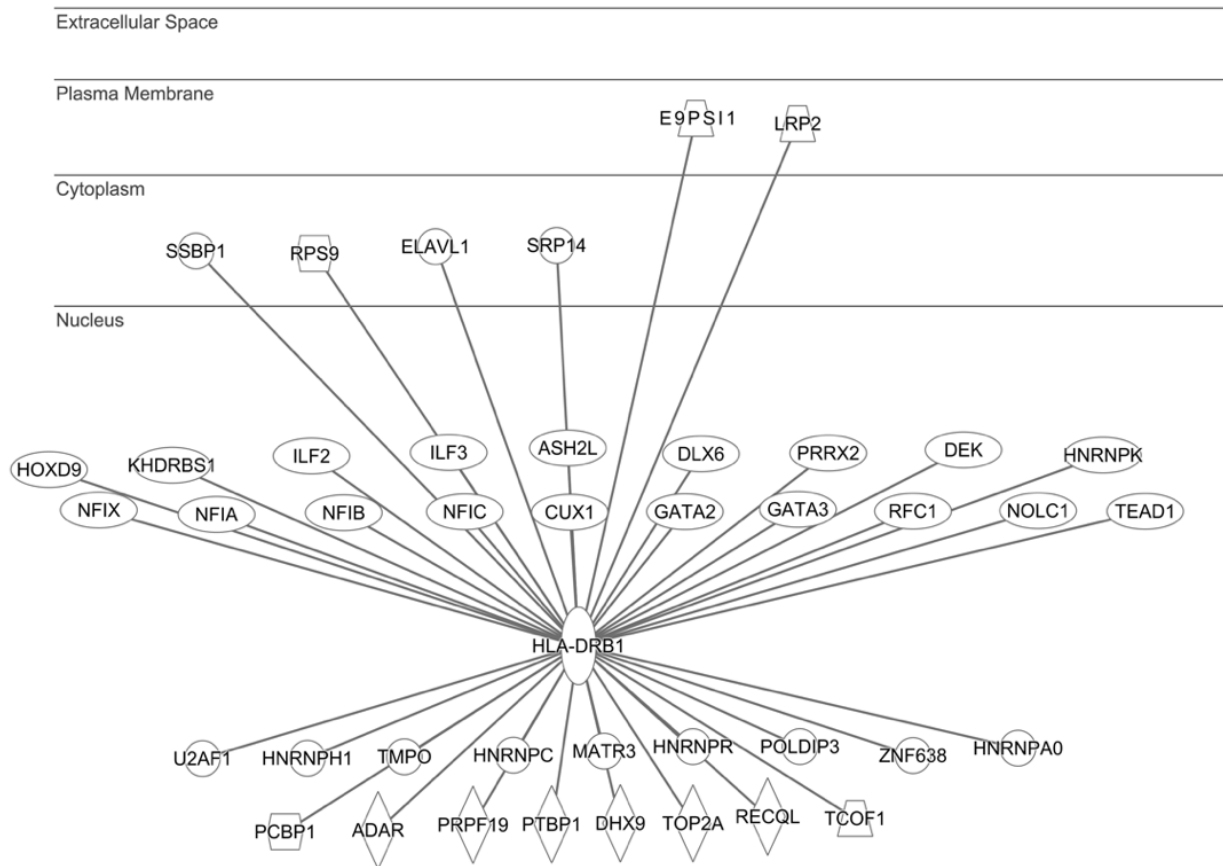

16

17

18 **Supplementary Figure 4. qPCR showing a significant alteration of the *HLA-DQA1* and**  
 19 ***HLA-DRB1* expression by downregulating *GATA2* (A), *GATA3* (B), *NFIB* (C), *NFIC* (D) and**  
 20 ***CUX1* (E) in the siRNA knockdown HMC3 cells. Data for qPCR represents the combination of**  
 21 **three biologically independent experiments (n=3), each in duplicate. GAPDH was used as**  
 22 **control for qPCR.**

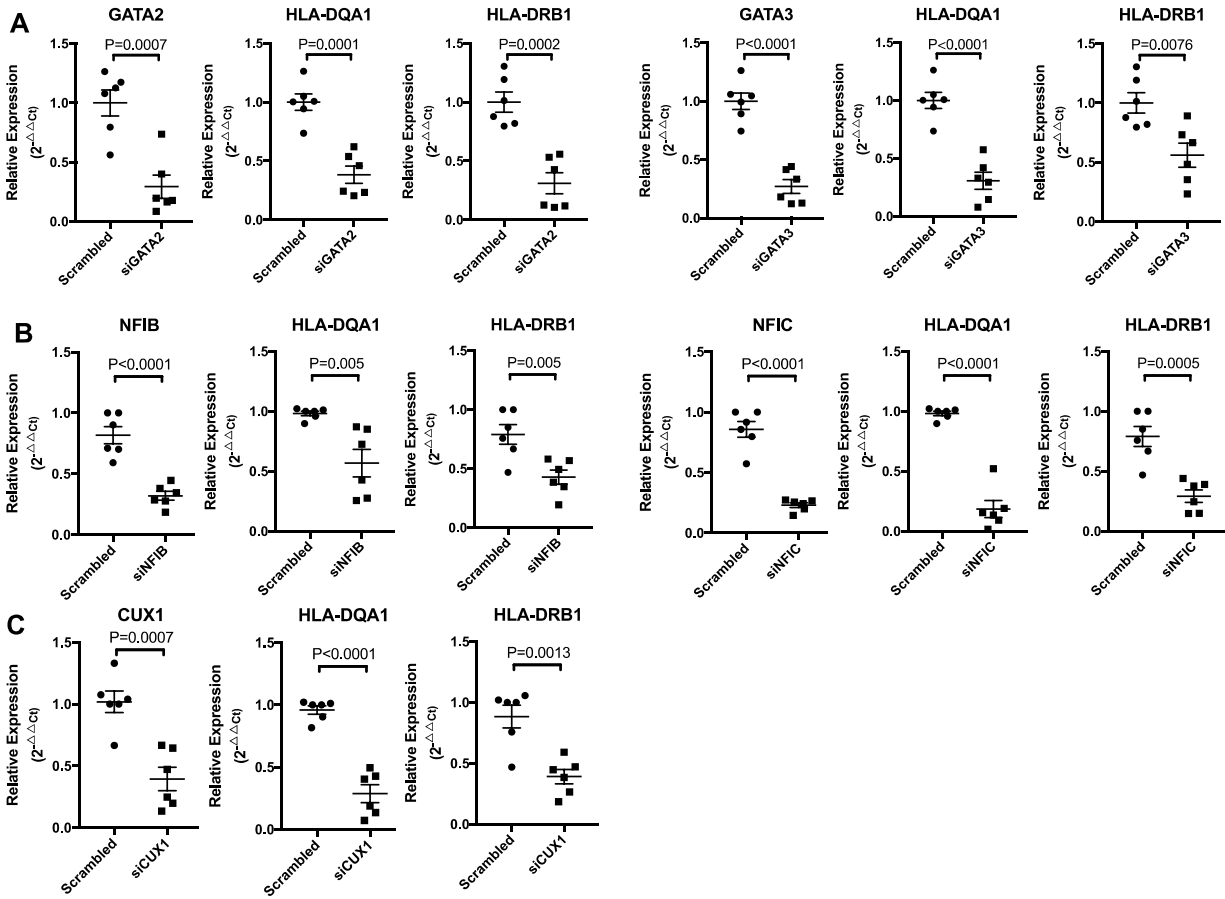

23

24

25 **Supplementary Figure 5. qPCR showing a significant downregulation of *HLA-DMA* (left)**  
26 **and *HLA-DQB1* (right) expression in the *CUX1*, *GATA2*, and *GATA3* shRNA knockdown**  
27 ***HMC3* cells. Data for qPCR represents a combination of three biologically independent**  
28 **experiments (n=3). GAPDH was used as control for qPCR. \* *p*-value < 0.05; \*\* *p*-value < 0.001;**  
29 **and \*\*\* *p*-value < 0.0001;**

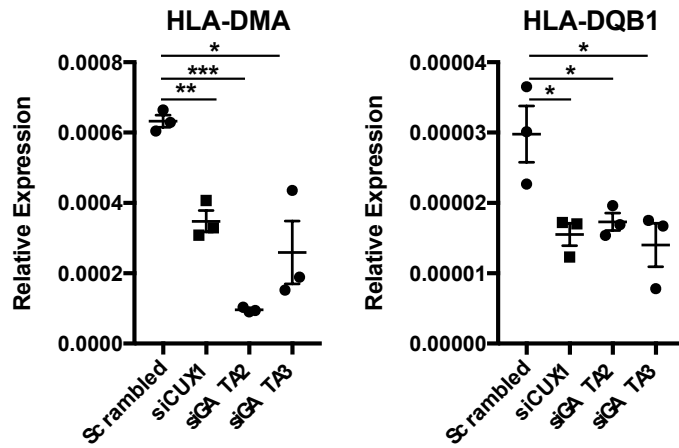

30

31

32 **Supplementary Table 1. 58 SNPs on the *HLA-DRB1/DQA1* locus in LD ( $R^2 > 0.8$ ) with**  
 33 **rs9271192 associated with LOAD with an overall OR = 1.11 and  $P < 2.9 \times 10^{-12}$ .**

|                                                           | SeqID     |                          | SeqID       |                          | SeqID     |
|-----------------------------------------------------------|-----------|--------------------------|-------------|--------------------------|-----------|
| <b>Candidate fSNP</b>                                     | rs9271189 | <b>non-fSNPs</b>         | rs202092830 | <b>non-fSNPs</b>         | rs9271179 |
| <b>-0.05 &gt; slope &gt; 0.05 and a p-value &lt; 0.05</b> | rs9271200 | <b>p-value &gt; 0.05</b> | rs2894378   | <b>p-value &gt; 0.05</b> | rs9271182 |
|                                                           | rs9271213 |                          | rs79267592  |                          | rs9271186 |
|                                                           | rs9271243 |                          | rs9271094   |                          | rs9271192 |
|                                                           | rs9271247 |                          | rs9271096   |                          | rs9271193 |
|                                                           |           |                          | rs9271100   |                          | rs9271194 |
|                                                           |           |                          | rs9271101   |                          | rs9271198 |
|                                                           |           |                          | rs9271103   |                          | rs9271199 |
|                                                           |           |                          | rs9271104   |                          | rs9271201 |
|                                                           |           |                          | rs9271105   |                          | rs9271239 |
|                                                           |           |                          | rs9271146   |                          | rs9271240 |
|                                                           |           |                          | rs9271150   |                          | rs9271246 |
| <b>putative fSNPs</b>                                     | rs3997874 |                          | rs9271151   |                          | rs9271247 |
| <b>-0.05 &lt; slope &lt; 0.05 and a p-value &lt; 0.05</b> | rs9271258 |                          | rs9271153   |                          | rs9271248 |
|                                                           | rs9271202 |                          | rs9271156   |                          | rs9271251 |
|                                                           | rs3997871 |                          | rs9271170   |                          | rs9271255 |
|                                                           | rs9271149 |                          | rs9271171   |                          | rs9271257 |
|                                                           | rs9271163 |                          | rs9271172   |                          | rs927174  |
|                                                           | rs9271180 |                          | rs9271173   |                          | rs9281945 |
|                                                           | rs9271252 |                          | rs9271174   |                          | rs9281946 |
|                                                           | rs9271260 |                          | rs9271178   |                          | rs9271205 |
|                                                           | rs9271090 |                          | rs9271179   |                          | rs9271242 |
|                                                           | rs9271092 |                          | rs9271182   |                          | rs9271162 |

34

35

36 **Supplementary Table 2. Epigenetic and functional annotations of the 6 SNPs on the**  
 37 **LOAD associated *HLA-DRB1/DQA1* locus using HaploReg 4.1.**

|                 | SNP       | Promoter histone marks | Enhancer histone marks | DNase       | Proteins bound   | Motifs changed   | Score |
|-----------------|-----------|------------------------|------------------------|-------------|------------------|------------------|-------|
| Candidate fSNPs | rs9271189 | ESC, BLD               | IPSC, BLD, THYM        | BLD,BLD     |                  | Hoxa13,Mef2      | 4     |
|                 | rs9271200 | BLD                    | IPSC, BLD, THYM        | BLD,BLD,BLD | BATF,MEF2A,MEF2C |                  | 4     |
|                 | rs9271213 |                        | BLD                    | BLD         |                  | 5 altered motifs | 3     |
|                 | rs9271243 |                        | BLD                    |             |                  | Mef2             | 2     |
|                 | rs9281945 |                        | BLD                    |             |                  | EBF,Hsf,Myf      | 2     |
|                 | rs9271247 |                        |                        |             |                  | CEBPA            | 1     |

38

39

40 **Supplementary Table 3. Primers used in this work.**

| Applications        | Primer Name                                                                      | Sequence (5' -3')                                                                |                                                                                |
|---------------------|----------------------------------------------------------------------------------|----------------------------------------------------------------------------------|--------------------------------------------------------------------------------|
| Q-PCR               | ELAVL1-F                                                                         | GGTGACATCGGGAGAACG                                                               |                                                                                |
|                     | ELAVL1-R                                                                         | CTGAACAGGCTCTGTAAGTCTAT                                                          |                                                                                |
|                     | HNRNPAD-F                                                                        | GCBACTGATCGAGCACTTC                                                              |                                                                                |
|                     | HNRNPAD-R                                                                        | CSCGCTGATCTGGAAATAC                                                              |                                                                                |
|                     | ILF2-F                                                                           | CGCTGCTTGCAGATCTGG                                                               |                                                                                |
|                     | ILF2-R                                                                           | TGTGTGACTCTAAAGTTGCCAC                                                           |                                                                                |
|                     | ILF3-F                                                                           | TTAGCTGGAGAAACGCTATCAGT                                                          |                                                                                |
|                     | ILF3-R                                                                           | AATGACACAGACTTCAGCCC                                                             |                                                                                |
|                     | DQA-F                                                                            | CAGTTGGTCTCCAGACA                                                                |                                                                                |
|                     | DQA-R                                                                            | GTCCATTCTCTGCTCCGTAG                                                             |                                                                                |
|                     | DRB1-F                                                                           | TCATCTACTCAGGAATCAGAAAG                                                          |                                                                                |
|                     | DRB1-R                                                                           | TGTCATCTGCACCTCAGCTC                                                             |                                                                                |
|                     | NFB-F                                                                            | GCTGTGCTTATCCATCCCG                                                              |                                                                                |
|                     | NFB-R                                                                            | TGCCCTTTGAACAGATGACCA                                                            |                                                                                |
|                     | NFC-F                                                                            | CGSCCTCCAGCTTAC                                                                  |                                                                                |
|                     | NFC-R                                                                            | ATGGACGCTAGGGAATG                                                                |                                                                                |
|                     | CLX1-F                                                                           | CCATGGAGTTGCACCGT                                                                |                                                                                |
|                     | CLX1-R                                                                           | CACGAGCGGTTCTCTC                                                                 |                                                                                |
|                     | GAPDH-F                                                                          | CGACCACTTTGTCAAGCTCA                                                             |                                                                                |
|                     | GAPDH-R                                                                          | AGGGGTACATGGCAACTG                                                               |                                                                                |
| shRNA lentivirus    | shGATA2-F                                                                        | CCGGCCGGCACCTGTTCGCAATTCGAGAAATTCACACAGGTGCCGTTTTTG                              |                                                                                |
|                     | shGATA2-R                                                                        | AATCAAAACCGCACCTGTTCGCAATTCGAGAAATTCACACAGGTGCCGTTTTTG                           |                                                                                |
|                     | shGATA3-F                                                                        | CCGGCCGAGACAGCTCGTTAACCTCGAGTTAACGAGCTGTTCTCGGTTTTTG                             |                                                                                |
|                     | shGATA3-R                                                                        | AATCAAAACCGCACAGCTCGTTAACCTCGAGTTAACGAGCTGTTCTCGGTTTTTG                          |                                                                                |
|                     | shELAVL1-F                                                                       | CCGGGAAACGAATTTGATCGCACTCGAGTTGAGCATCAATCGTTCTTTTTG                              |                                                                                |
|                     | shELAVL1-R                                                                       | AATCAAAAGAGCAAGTATGATCGCACTCGAGTTGAGCATCAATCGTTCTTTTTG                           |                                                                                |
|                     | shHNRNPAD-F                                                                      | CCGGCCGCTTCGTGTATTTCCAGAACGAGTCTGGAAATACAGGAGCGTTTTTG                            |                                                                                |
|                     | shHNRNPAD-R                                                                      | AATCAAAACCGGCTCGTGTATTTCCAGAACGAGTCTGGAAATACAGGAGCGTTTTTG                        |                                                                                |
|                     | shILF2-F                                                                         | CCGGGCTATCTGCTTCTGAAATCTCGAGATATTCAGAAACAGATAGCTTTTTG                            |                                                                                |
|                     | shILF2-R                                                                         | AATCAAAAGCTATCTGCTTCTGAAATCTCGAGATATTCAGAAACAGATAGCTTTTTG                        |                                                                                |
|                     | shILF3-F                                                                         | CCGGGGTCTCTAGAGCGCTAACCTGAGTTAGAGCTCTAGGAGACCTTTTTG                              |                                                                                |
|                     | shILF3-R                                                                         | AATCAAAAGCTCTCTAGAGCGCTAACCTGAGTTAGAGCTCTAGGAGACCTTTTTG                          |                                                                                |
|                     | shNFB-F                                                                          | CCGGCCGACCTACACTCACTAATCTCGAGCTCGAGTGAATGATGATTTTTG                              |                                                                                |
|                     | shNFB-R                                                                          | AATCAAAAGCAGCACTACACTCACTAATCTCGAGCTCGAGTGAATGATGATTTTTG                         |                                                                                |
|                     | shNFC-F                                                                          | CCGGCCCGGTGAGAGAGAGATCTCGAGATCTCTGTCTCTCCAGCGGTTTTTG                             |                                                                                |
|                     | shNFC-R                                                                          | AATCAAAACCGGTGAGAGAGAGATCTCGAGATCTCTGTCTCTCCAGCGGTTTTTG                          |                                                                                |
|                     | shCLX1-F                                                                         | CCGGCCAGATATTGAACAGAGACTCGAGTCTCTGTCTCAATGCTGTTTTTG                              |                                                                                |
|                     | shCLX1-R                                                                         | AATCAAAACAGATATTGAACAGAGACTCGAGTCTCTGTCTCAATGCTGTTTTTG                           |                                                                                |
|                     | SDCP-MS                                                                          | rs271198G-F                                                                      | 5'BoagGTCTGTCCGTTGCTCCGTCGTAAGTCCGGATCCAGGGTGAATGCATGATCTCAAGTTAATGAATCGAATCCG |
|                     |                                                                                  | rs271198G-R                                                                      | GCGAATCGAATCATTAACTGAGAGATCGAATCAACCTCGATCCGGATCCATT                           |
| rs271200C-F         |                                                                                  | 5'BoagGTCTGTGTCCGTTGCTCCGTCGTAAGTCCGGATCCAGGGTGAATGCATGATCTCAAGTTAATGAATCGAATCCG |                                                                                |
| rs271200C-R         |                                                                                  | GCGAATCGAATCATTAACTGAGAGATCGAATCAACCTCGATCCGGATCCATT                             |                                                                                |
| rs271213T-F         |                                                                                  | GTCTGTGTCCGTTGCTCCGTCGTAAGTCCGGATCCAGGGTGAATGCATGATCTCAAGTTAATGAATCGAATCCG       |                                                                                |
| rs271213T-R         |                                                                                  | GCGAATCGAATCATTAACTGAGAGATCGAATCAACCTCGATCCGGATCCATT                             |                                                                                |
| rs271243T-F         |                                                                                  | 5'BoagGTCTGTGTCCGTTGCTCCGTCGTAAGTCCGGATCCAGGGTGAATGCATGATCTCAAGTTAATGAATCGAATCCG |                                                                                |
| rs271243T-R         |                                                                                  | GCGAATCGAATCATTAACTGAGAGATCGAATCAACCTCGATCCGGATCCATT                             |                                                                                |
| rs271247T-F         |                                                                                  | 5'BoagGTCTGTGTCCGTTGCTCCGTCGTAAGTCCGGATCCAGGGTGAATGCATGATCTCAAGTTAATGAATCGAATCCG |                                                                                |
| rs271247T-R         |                                                                                  | GCGAATCGAATCATTAACTGAGAGATCGAATCAACCTCGATCCGGATCCATT                             |                                                                                |
| rs281945C-AT-F      | 5'BoagGTCTGTGTCCGTTGCTCCGTCGTAAGTCCGGATCCAGGGTGAATGCATGATCTCAAGTTAATGAATCGAATCCG |                                                                                  |                                                                                |
| rs281945C-AT-R      | GCGAATCGAATCATTAACTGAGAGATCGAATCAACCTCGATCCGGATCCATT                             |                                                                                  |                                                                                |
| AIPR-Vb             | rs191138-A                                                                       | 5'BoagGGGTTGAATGCAATATCTCAAGTTAAT                                                |                                                                                |
|                     | rs191138-A                                                                       | ATTAACTGAGAGATTCGAATCAACCCCT                                                     |                                                                                |
|                     | rs191138-G                                                                       | 5'BoagGGGTTGAATGCAATATCTCAAGTTAAT                                                |                                                                                |
|                     | rs191138-G                                                                       | ATTAACTGAGAGATTCGAATCAACCCCT                                                     |                                                                                |
|                     | rs19121200-C                                                                     | 5'BoagTACTTAACTATTCCGGACATGATAAATA                                               |                                                                                |
|                     | rs19121200-C                                                                     | TATTTATCATGGTCCGGAGATGATGATGATA                                                  |                                                                                |
|                     | rs19121200-T                                                                     | 5'BoagTACTTAACTATTCCGGACATGATAAATA                                               |                                                                                |
|                     | rs19121200-T                                                                     | TATTTATCATGGTCCGGAGATGATGATGATA                                                  |                                                                                |
|                     | rs19121243-C                                                                     | 5'BoagSCCATTGGTCACTACATTTGGCTCAAAATA                                             |                                                                                |
|                     | rs19121243-C                                                                     | TATTTGAGCCAAATGAGTGACCAATGGC                                                     |                                                                                |
|                     | rs19121243-T                                                                     | 5'BoagSCCATTGGTCACTACATTTGGCTCAAAATA                                             |                                                                                |
|                     | rs19121243-T                                                                     | TATTTGAGCCAAATGAGTGACCAATGGC                                                     |                                                                                |
|                     | rs191281945-C                                                                    | 5'BoagAACCACTTGGCCAGCTCTCAGGATCTTCT                                              |                                                                                |
|                     | rs191281945-C                                                                    | AGAGATCTGAGACATGCCCCAGGTGGTT                                                     |                                                                                |
|                     | rs191281945-CAT                                                                  | 5'BoagAACCACTTGGCCAGATGTTCTCAGGATCTT                                             |                                                                                |
| rs191281945-CAT     | AGATCTGAGACATGCCCCAGGTGGTT                                                       |                                                                                  |                                                                                |
| rs191281945-A       | 5'BoagTACTGTGACCAAGGTTTTACCANTAAC                                                |                                                                                  |                                                                                |
| rs191281945-G       | TGTTATGGTAAACCTTGGTCAACAGTA                                                      |                                                                                  |                                                                                |
| rs191281945-G       | 5'BoagTACTGTGACCAAGGTTTTACCANTAAC                                                |                                                                                  |                                                                                |
| rs191281945-G       | TGTTATGGTAAACCTTGGTCAACAGTA                                                      |                                                                                  |                                                                                |
| Luciferase Reporter | LRA198-G-F                                                                       | CAGGGTTGAATGCAATGATCTCAAGTTAATC                                                  |                                                                                |
|                     | LRA198-G-R                                                                       | TCGAGATTAACTGAGAGATTCGAATCAACCTGAGCT                                             |                                                                                |
|                     | LRA198-A-F                                                                       | CAGGGTTGAATGCAATGATCTCAAGTTAATC                                                  |                                                                                |
|                     | LRA198-A-R                                                                       | TCGAGATTAACTGAGAGATTCGAATCAACCTGAGCT                                             |                                                                                |
|                     | LRA200-C-F                                                                       | CTACTTAACTCACTCCGGACATGATAAATAC                                                  |                                                                                |
|                     | LRA200-C-R                                                                       | TCGAGATTATCATGGTCCGGAGATGATGATGAGCT                                              |                                                                                |
|                     | LRA200-T-F                                                                       | CTACTTAACTCACTCCGGACATGATAAATAC                                                  |                                                                                |
|                     | LRA200-T-R                                                                       | TCGAGATTATCATGGTCCGGAGATGATGATGAGCT                                              |                                                                                |
|                     | LRA213-G-F                                                                       | CATCTCTTTTCTTCCAGGCTCTCCCTTGAC                                                   |                                                                                |
|                     | LRA213-G-R                                                                       | TCGAGTCAGGGAAAGACTCGAAAGAAAGAGATGAGCT                                            |                                                                                |
|                     | LRA213-C-F                                                                       | CATCTCTTTTCTTCCAGGCTCTCCCTTGAC                                                   |                                                                                |
|                     | LRA213-C-R                                                                       | TCGAGTCAGGGAAAGACTCGAAAGAAAGAGATGAGCT                                            |                                                                                |
|                     | LRA213-T-F                                                                       | CATCTCTTTTCTTCCAGGCTCTCCCTTGAC                                                   |                                                                                |
|                     | LRA213-T-R                                                                       | TCGAGTCAGGGAAAGACTCGAAAGAAAGAGATGAGCT                                            |                                                                                |
|                     | LRA243-C-F                                                                       | CGCCATTGGTCACTCAATTTGGCTCAAAATAC                                                 |                                                                                |
|                     | LRA243-C-R                                                                       | TCGAGATTATGAGCCAAATGATGAGTCAACCTGGCAGCT                                          |                                                                                |
|                     | LRA243-T-F                                                                       | CGCCATTGGTCACTCAATTTGGCTCAAAATAC                                                 |                                                                                |
|                     | LRA243-T-R                                                                       | TCGAGATTATGAGCCAAATGATGAGTCAACCTGGCAGCT                                          |                                                                                |
|                     | LRA247-A-F                                                                       | CCTACTGTGACCAAGGTTTTACCANTAACAC                                                  |                                                                                |
|                     | LRA247-A-R                                                                       | TCGAGTGTATGTTAAACCTCTGGTCAACAGTAGAGCT                                            |                                                                                |
| LRA247-G-F          | CCTACTGTGACCAAGGTTTTACCANTAACAC                                                  |                                                                                  |                                                                                |
| LRA247-G-R          | TCGAGTGTATGTTAAACCTCTGGTCAACAGTAGAGCT                                            |                                                                                  |                                                                                |
| LRA247-T-F          | CCTACTGTGACCAAGGTTTTACCANTAACAC                                                  |                                                                                  |                                                                                |
| LRA247-T-R          | TCGAGTGTATGTTAAACCTCTGGTCAACAGTAGAGCT                                            |                                                                                  |                                                                                |
| LRA945-G-F          | CACCAGCATGATTTGGTGGAGAGCCAGGGGTGC                                                |                                                                                  |                                                                                |
| LRA945-G-R          | TCGAGCACCCCTGGCTCTACCAATACATGCGGGTGAAGCT                                         |                                                                                  |                                                                                |
| LRA945-A-F          | CACCAGCATGATTTGGTGGAGAGCCAGGGGTGC                                                |                                                                                  |                                                                                |
| LRA945-A-R          | TCGAGCACCCCTGGCTCTACCAATACATGCGGGTGAAGCT                                         |                                                                                  |                                                                                |





43 **Supplementary Table 4. Antibodies used in this work.**

| Antibody          | Manufacturer       | Cat#              | Source        | Website for validation and dilution                                                                                                                                         |
|-------------------|--------------------|-------------------|---------------|-----------------------------------------------------------------------------------------------------------------------------------------------------------------------------|
| GATA2             | Abclonal           | A0677             | Rabbit        | <a href="https://abclonal.com.cn/catalog/A0677">https://abclonal.com.cn/catalog/A0677</a>                                                                                   |
| GATA3             | Abclonal           | A1638             | Rabbit        | <a href="https://abclonal.com.cn/catalog/A1638">https://abclonal.com.cn/catalog/A1638</a>                                                                                   |
| HNRNPA0           | Proteintech        | 10848-1-AP        | mouse         | <a href="https://www.ptgcn.com/products/HNRNPA0-Antibody-10848-1-AP.htm">https://www.ptgcn.com/products/HNRNPA0-Antibody-10848-1-AP.htm</a>                                 |
| ELAVL1            | Proteintech        | 11910-1-AP        | Rabbit        | <a href="https://www.ptglab.com/products/HuR-Antibody-11910-1-AP.htm">https://www.ptglab.com/products/HuR-Antibody-11910-1-AP.htm</a>                                       |
| <u>ILF2/NF45</u>  | <u>Proteintech</u> | <u>14714-1-AP</u> | <u>Rabbit</u> | <a href="https://www.ptglab.com/products/NF45-Antibody-14714-1-AP.htm">https://www.ptglab.com/products/NF45-Antibody-14714-1-AP.htm</a>                                     |
| ILF3              | Proteintech        | 19887-1-AP        | Rabbit        | <a href="https://www.ptglab.com/products/NF90,ILF3-Antibody-19887-1-AP.htm">https://www.ptglab.com/products/NF90,ILF3-Antibody-19887-1-AP.htm</a>                           |
| NFIB antibody     | abclonal           | A15294            | Rabbit        | <a href="https://abclonal.com.cn/catalog/A15294">https://abclonal.com.cn/catalog/A15294</a>                                                                                 |
| NFIC antibody     | abclonal           | A15074            | Rabbit        | <a href="https://abclonal.com.cn/catalog/A15074">https://abclonal.com.cn/catalog/A15074</a>                                                                                 |
| HLA-DQA1          | Abclonal           | A2168             | Rabbit        | <a href="https://abclonal.com.cn/catalog/A2168">https://abclonal.com.cn/catalog/A2168</a>                                                                                   |
| HLA-DRB1          | Abclonal           | A7685             | Rabbit        | <a href="https://abclonal.com.cn/catalog/A7685">https://abclonal.com.cn/catalog/A7685</a>                                                                                   |
| CUX1              | Sigma              | ABE217            | Rabbit        | <a href="https://www.sigmaaldrich.cn/CN/en/product/mm/abe217?context=product">https://www.sigmaaldrich.cn/CN/en/product/mm/abe217?context=product</a>                       |
| PARP-1(H-250)     | Santa Cruz         | sc-7150           | Rabbit        | <a href="https://www.scbt.com/scbt/zh/product/parp-1-antibody-h-250">https://www.scbt.com/scbt/zh/product/parp-1-antibody-h-250</a>                                         |
| $\alpha$ -Tubulin | Sigma              | T6074             | Mouse         | <a href="https://www.sigmaaldrich.com/catalog/product/sigma/t6074?lang=en&amp;region=US">https://www.sigmaaldrich.com/catalog/product/sigma/t6074?lang=en&amp;region=US</a> |

44

45
